# Supplementary material for: Increasing genomic prediction accuracy for unphenotyped full-sib families by modeling additive and dominance effects with large datasets in white spruce
Source: Frontiers journal article supplement (doi:10.3389/fpls.2023.1137834), 2023-03-22
Supplement: Data_Sheet_2.pdf [file Data_Sheet_2.pdf]

SUPPLEMENTARY FIGURES:

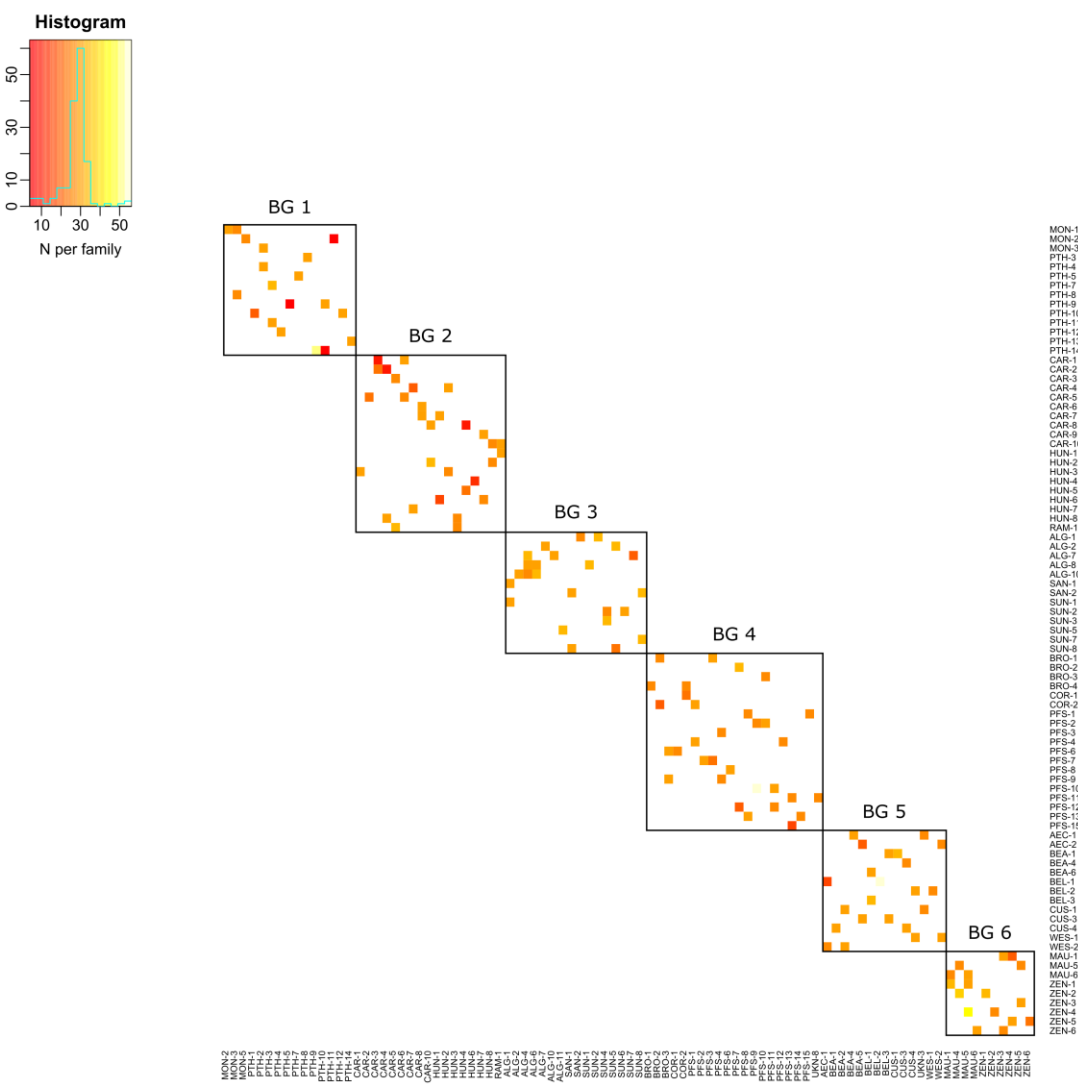

**Figure S1.** Partial diallel mating design for the six breeding groups (BGs, black rectangles) and the 4,066 trees used for analyses. Mothers and fathers are on the x and y axes, respectively. Each colored square represent a full-sib family and the colors indicate the number of trees sampled per full-sib family (top left color key with histogram). Dataset 1 included BGs 1, 2, 5 and 6, and dataset 2 included BGs 3 and 4.

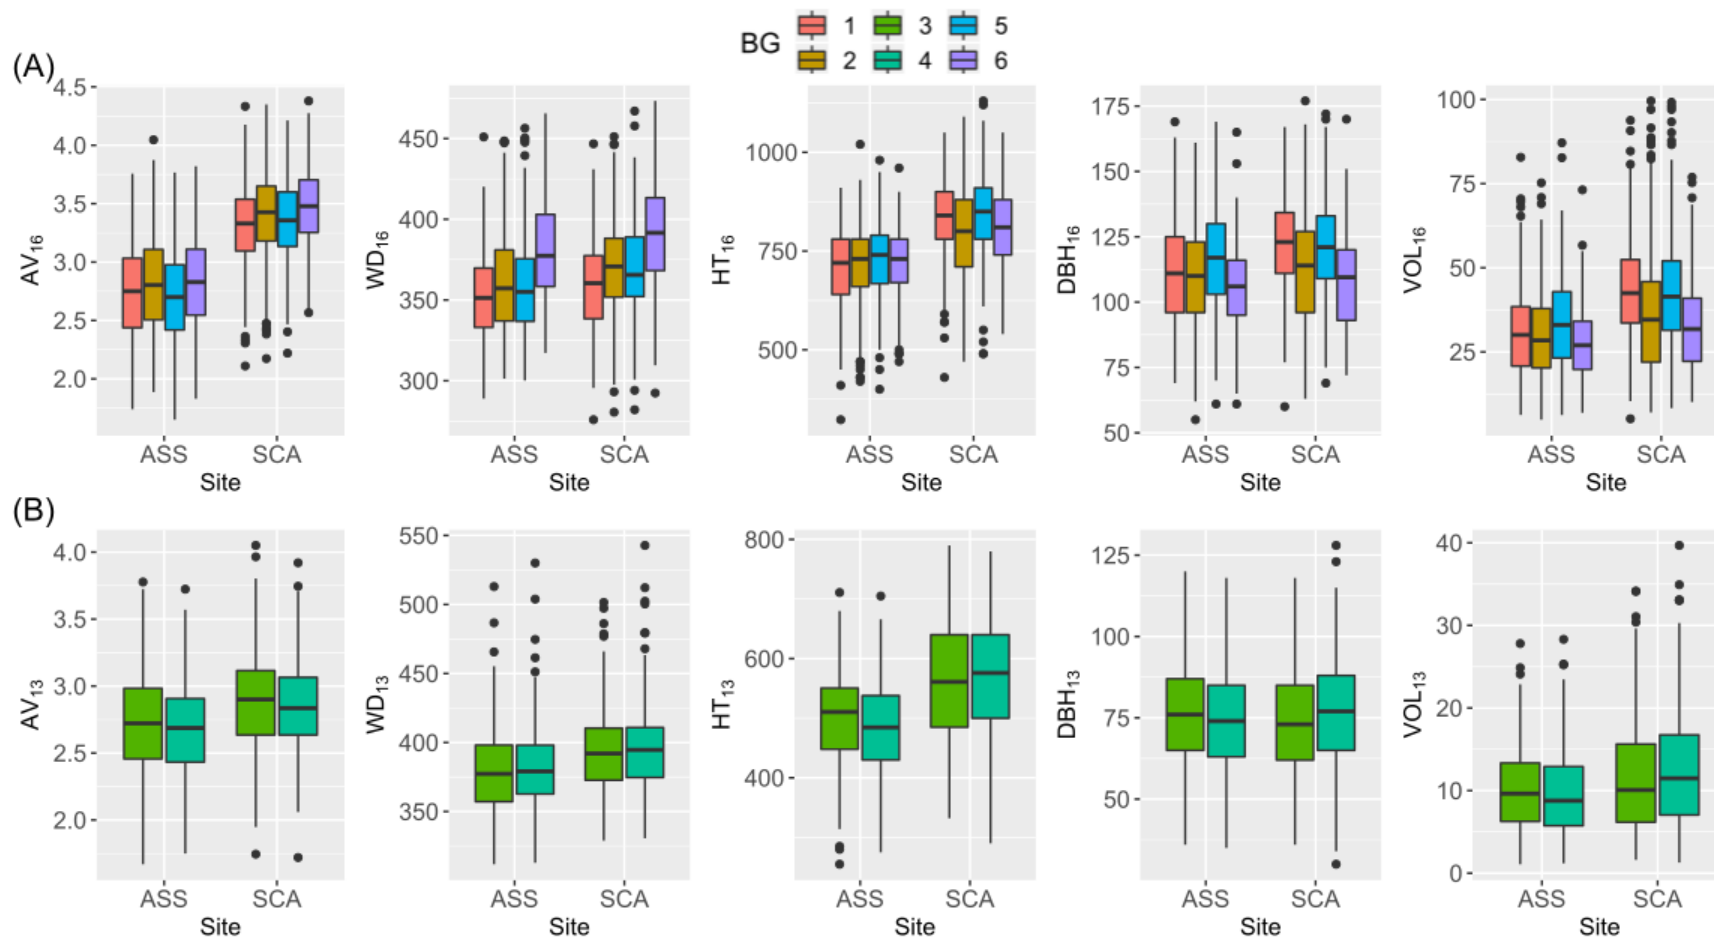

**Figure S2.** Boxplots of phenotypes for (A) dataset 1, that is breeding groups (BGs) 1, 2, 5, and 6; and for (B) dataset 2, that is BGs 3 and 4. Trees for BGs 1, 2, 5 and 6 were 16 years old, whereas those of BGs 3 and 4 were 13 years old. The phenotypes are grouped by sites Asselin (ASS) and St. Casimir (SCA) on the x-axis, and are colored by BG. See Table 2 for a description of traits.

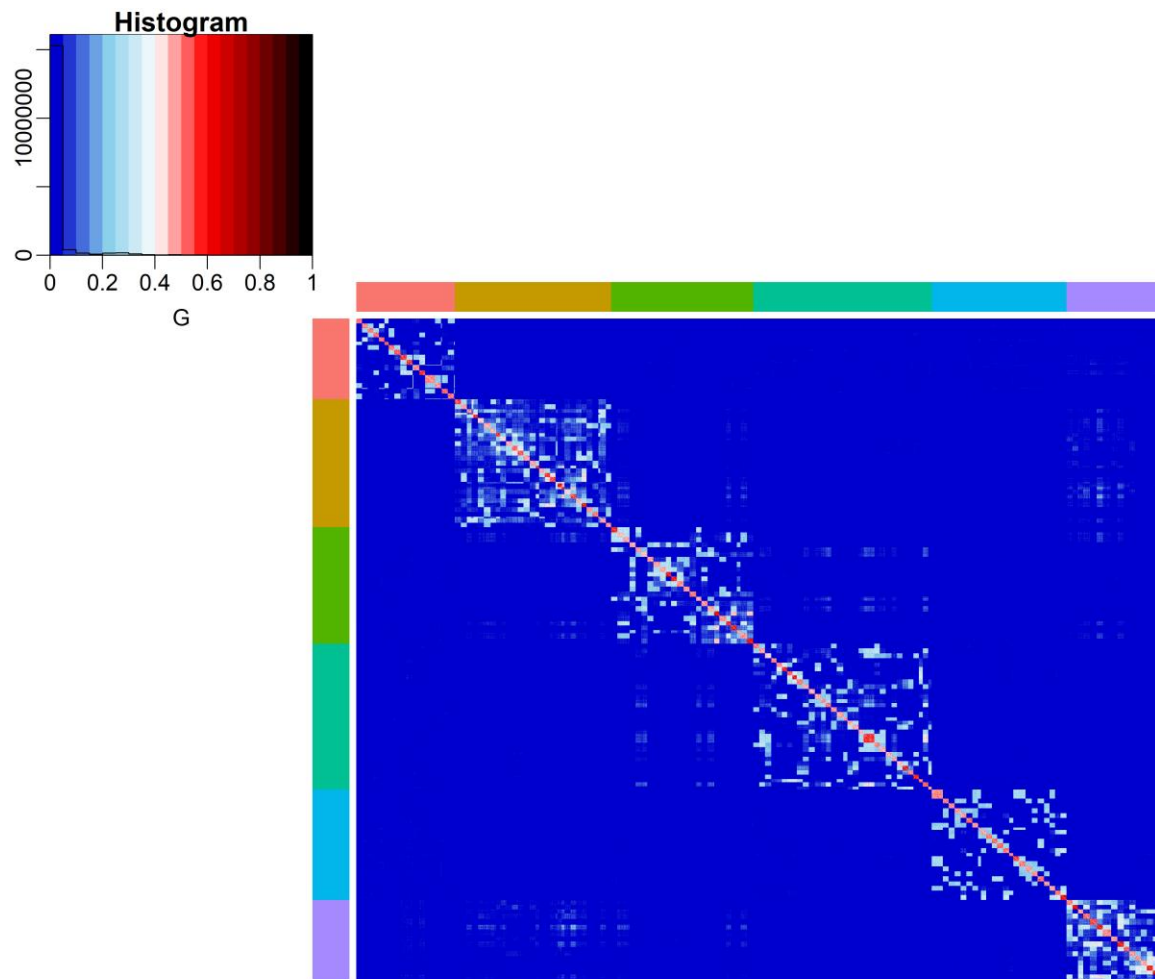

**Figure S3.** Realized genomic additive relationship matrix ( $\mathbf{G}_a$ ). The histogram on the top left represents the color key for the values of  $\mathbf{G}_a$ . The side colors on the x and y-axes represent the six breeding groups (BGs) in order 1, 2, 3, 4, 5, and 6 from top to bottom. Dataset 1 included the BGs 1, 2, 5 and 6, and dataset 2 included the BGs 3 and 4. The values of  $\mathbf{G}_a$  vary around 0.5 between full-sibs, around 0.25 between half-sibs, and around 0 for unrelated trees. The mean additive genomic relationship within full-sib families was 0.511 with a standard deviation of 0.072.

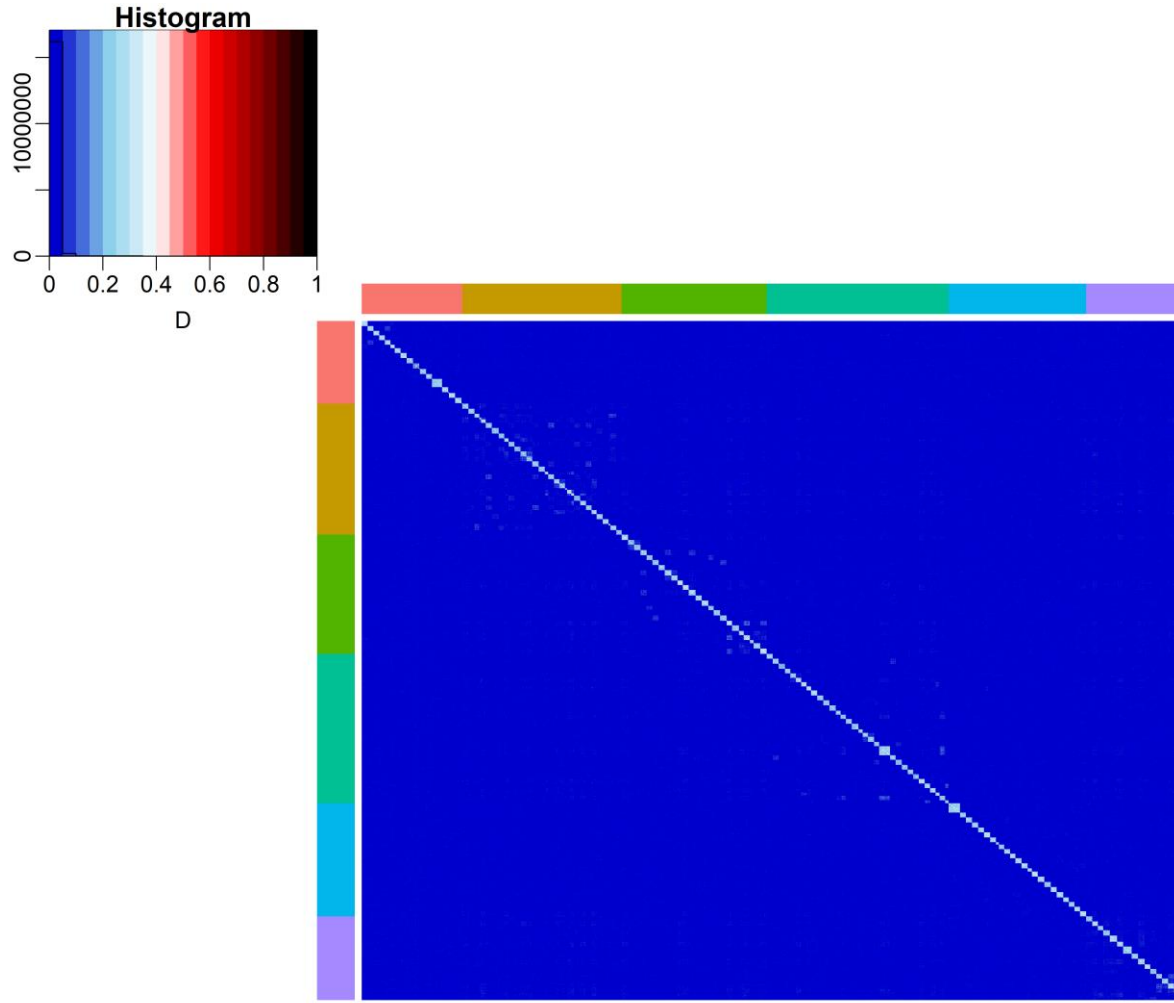

**Figure S4.** Realized genomic dominance relationship matrix ( $\mathbf{G}_d$ ). The histogram on the top left represents the color key for the values of  $\mathbf{G}_d$ . The side colors on the x and y-axes represent the six breeding groups (BGs) in order 1, 2, 3, 4, 5, and 6 from top to bottom. Dataset 1 included the BGs 1, 2, 5 and 6, and dataset 2 included the BGs 3 and 4. The values of  $\mathbf{G}_d$  vary around 0.25 between full-sibs, and around zero otherwise. The mean dominance genomic relationship within full-sib families was 0.251 with a standard deviation of 0.067.

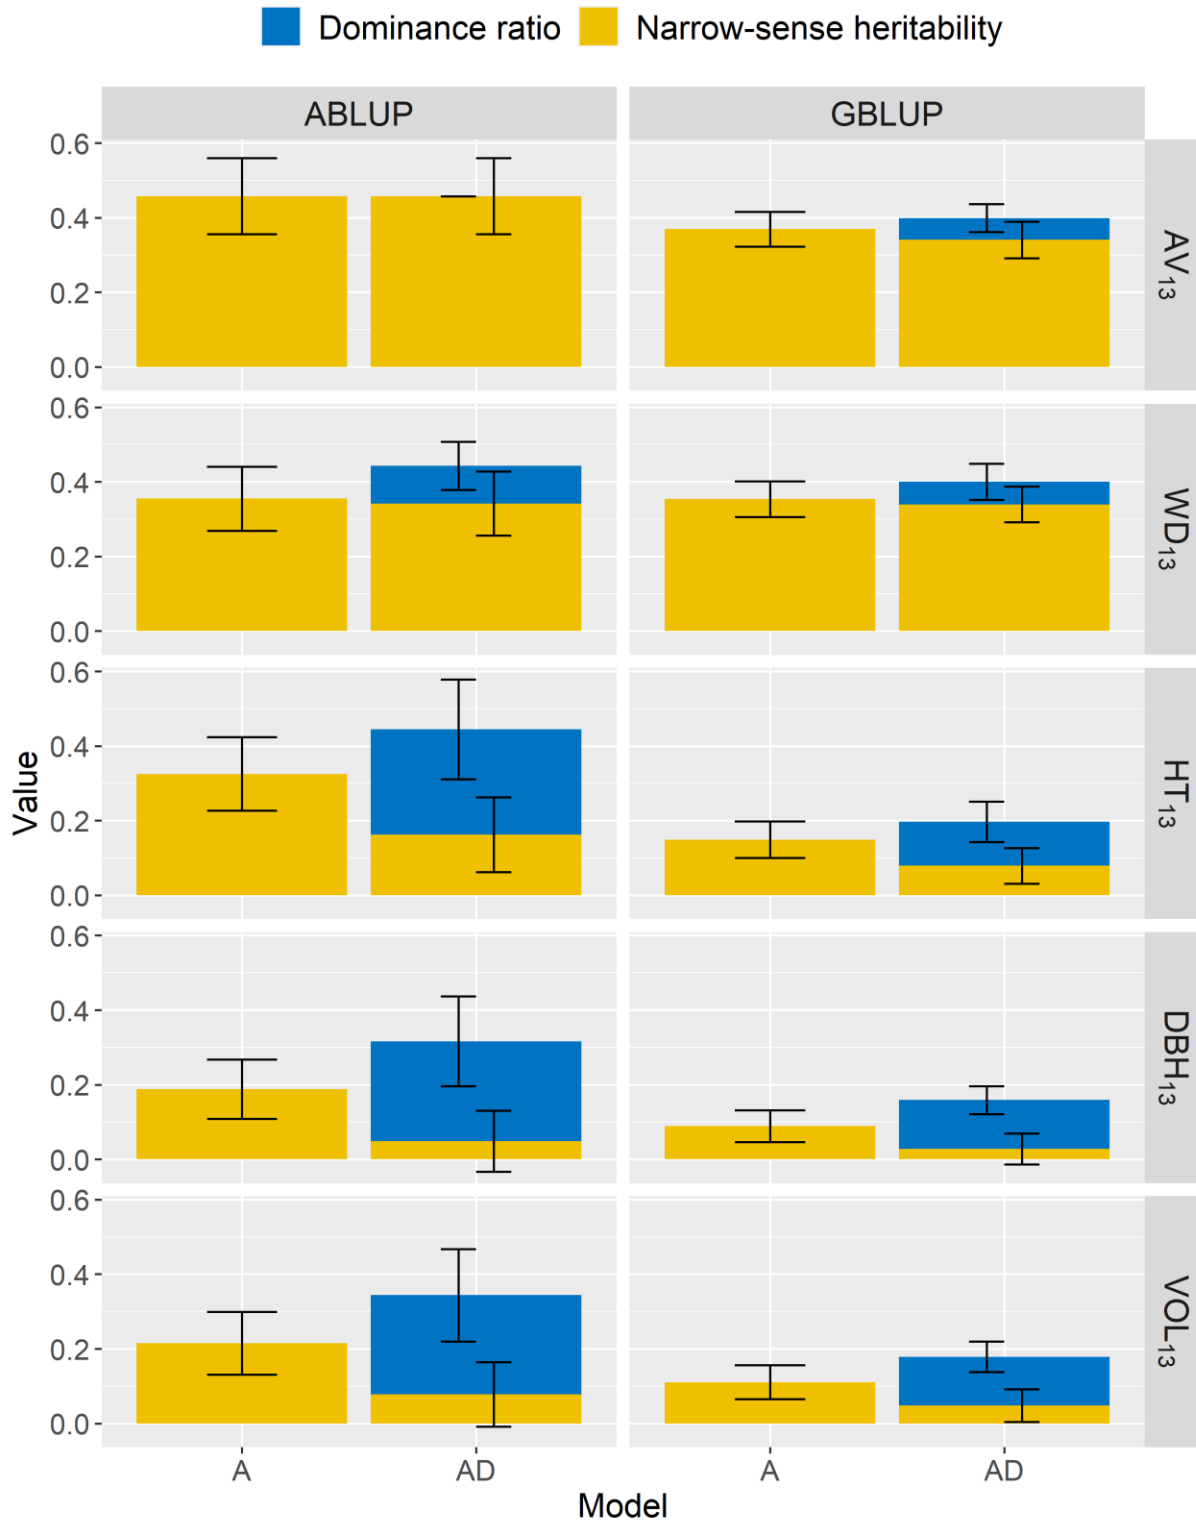

**Figure S5.** For the complete **dataset 2**, across-site narrow-sense heritabilities ( $\hat{h}_{ind}^2$ ) and dominance ratios ( $\hat{d}_{ind}^2$ ) estimated using additive (A) or additive-dominance (AD) models, with ABLUP or GBLUP. The broad-sense heritabilities ( $\hat{H}_{ind}^2$ ) are estimated as the sum of  $\hat{h}_{ind}^2$  and  $\hat{d}_{ind}^2$ . The error bars represent the approximated standard errors of estimates calculated using the delta method. See Table 2 for a description of traits.

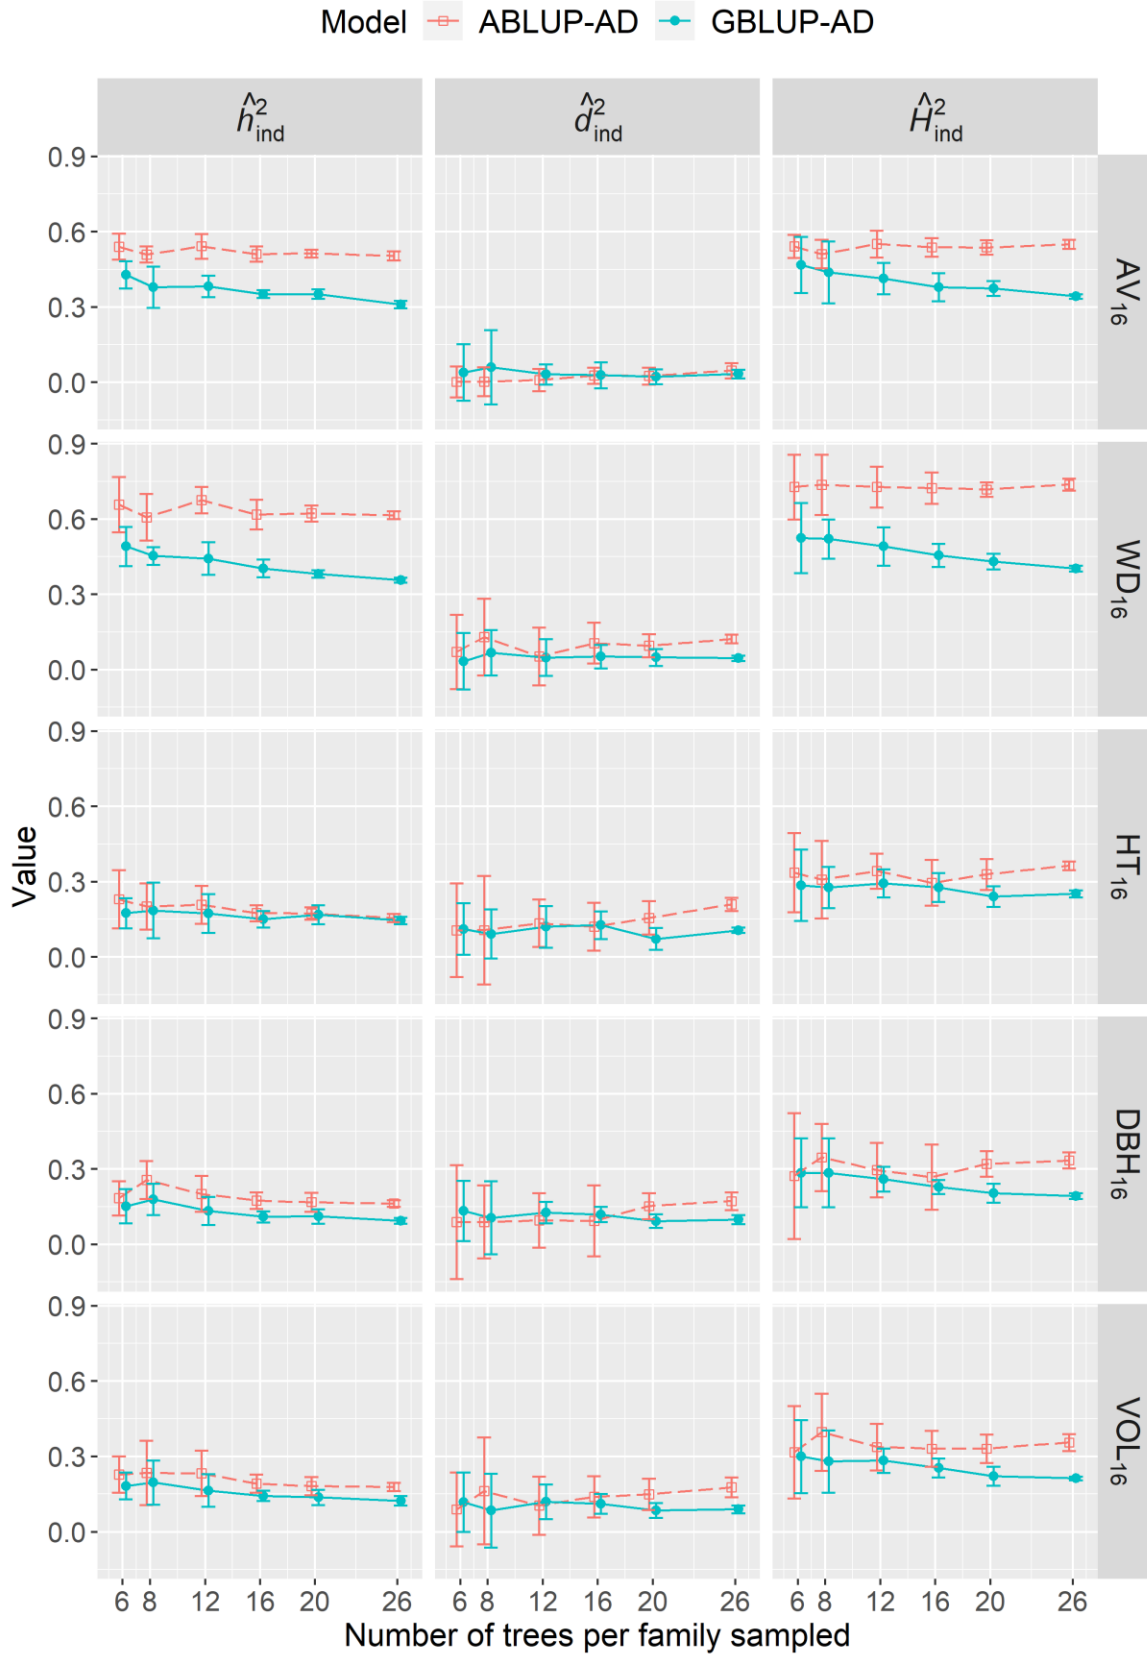

**Figure S6.** For **dataset 1**, across-site narrow-sense heritabilities ( $\hat{h}_{ind}^2$ ), dominance ratios ( $\hat{d}_{ind}^2$ ), and broad-sense heritabilities ( $\hat{H}_{ind}^2$ ) estimated when varying the number of trees per family sampled using the ABLUP-AD and GBLUP-AD additive-dominance models. The error bars represent the standard deviation of estimates across the 10 replications for each level of number of trees per family sampled. See Table 2 for a description of traits.

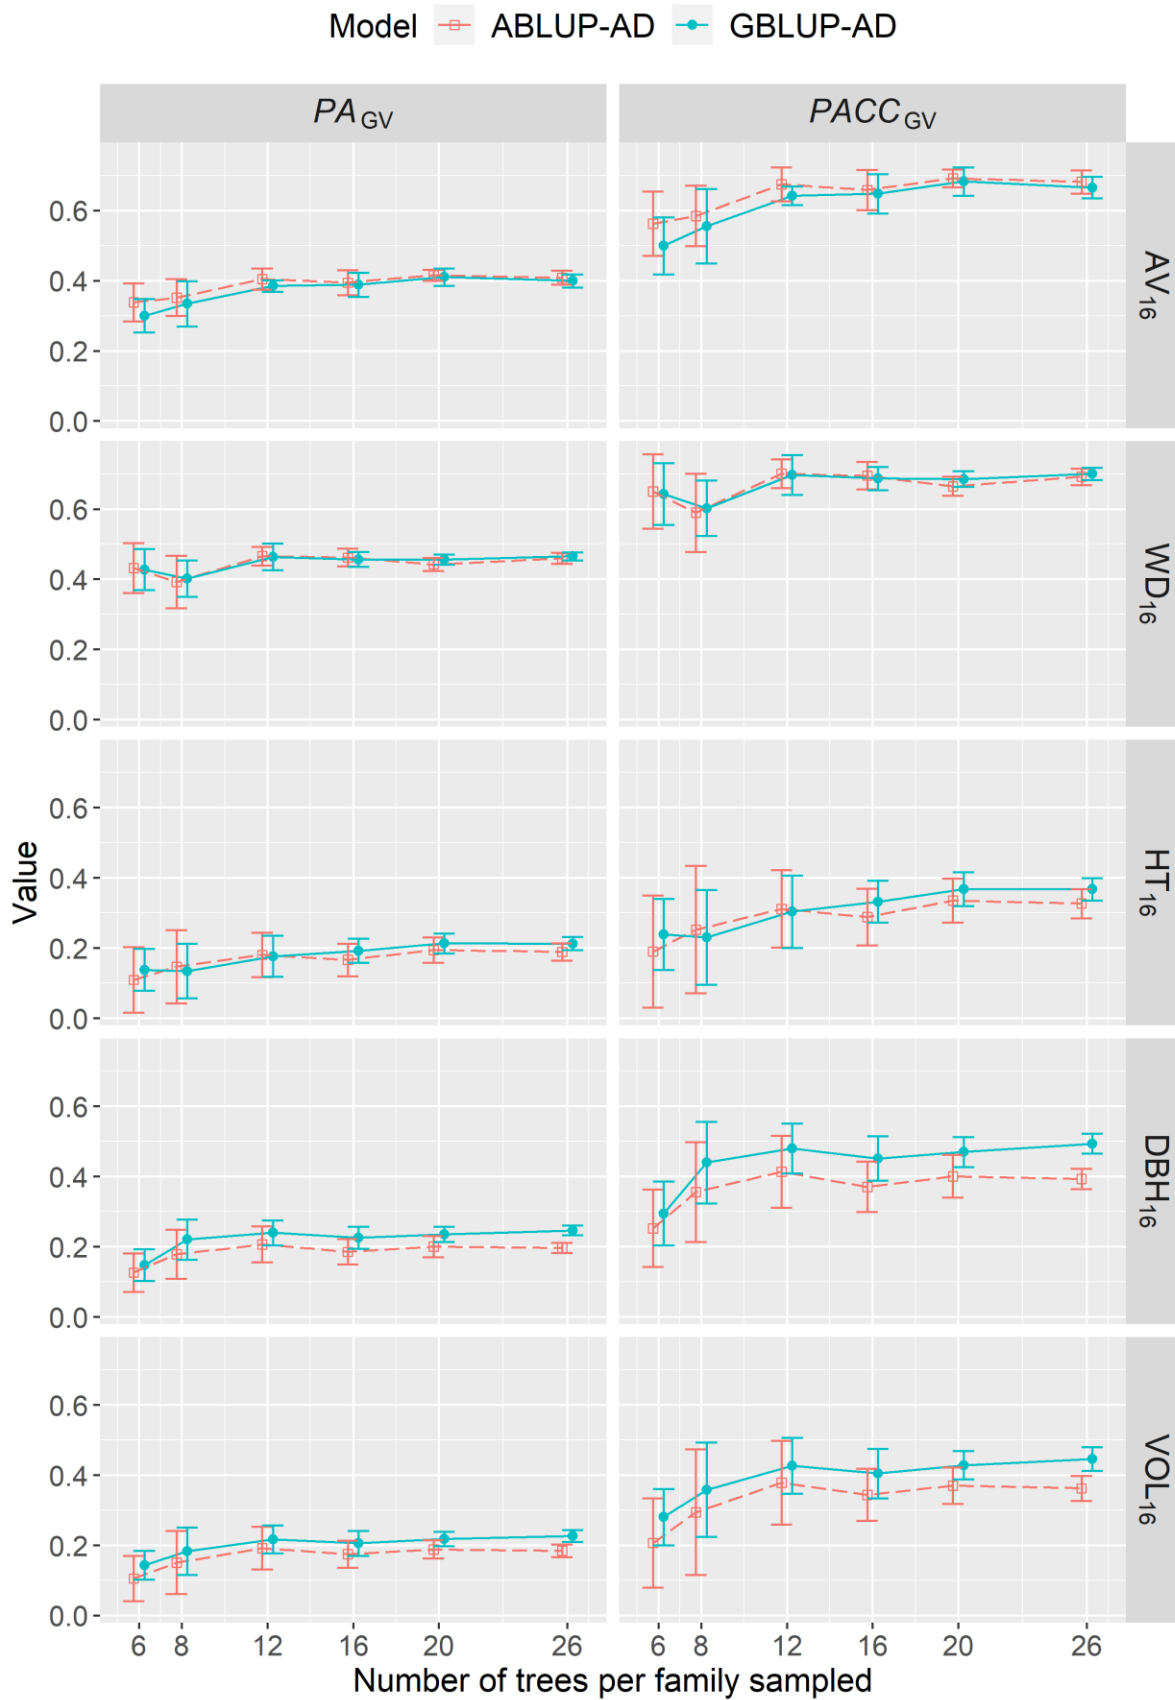

**Figure S7.** For **dataset 1**, Predictive ability ( $PA_{GV}$ ) and prediction accuracy of genetic values ( $PACC_{GV}$ ) estimated using CV2 and when varying the number of trees per family sampled using the ABLUP-AD and GBLUP-AD additive-dominance models. The error bars represent the standard deviation of estimates across the 10 replications for each level of number of trees per family sampled. See Table 2 for a description of traits.

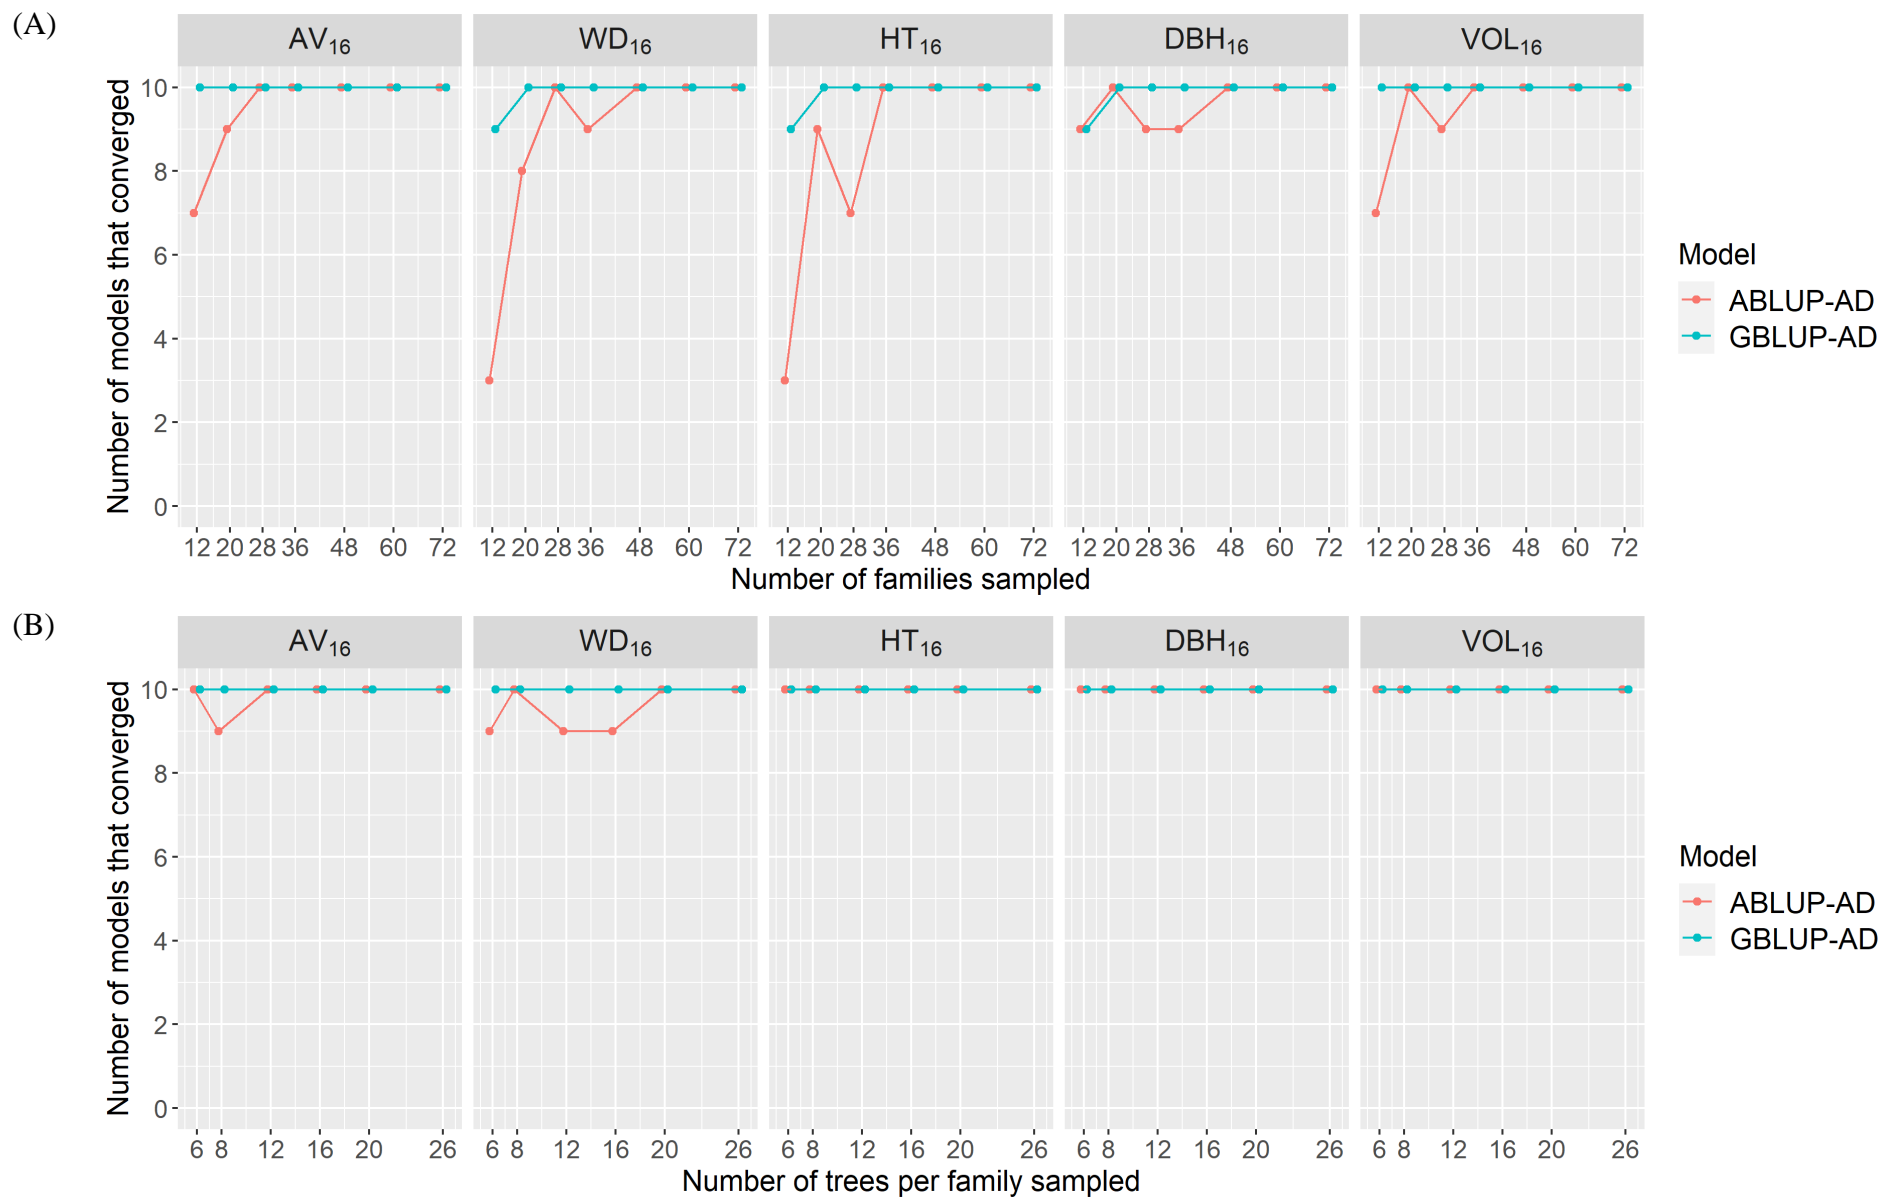

**Figure S8.** For **dataset 1**, number of models that converged using the ABLUP-AD and GBLUP-AD additive-dominance models when **(A)** varying the number of families sampled; and **(B)** varying the number of trees per family sampled. See Table 2 for a description of traits.
